# Supplementary material for: Boosting the degradation of antibiotics via peroxymonosulfate activation with a Cu-based metal–organic framework
Source: Royal Society of Chemistry journal article supplement (doi:10.1039/d4sc02850c), 2024-01-01
Supplement: d4sc02850c1.pdf [file d4sc02850c1.pdf]

## Electronic Supplementary Information

### Boosting the degradation of antibiotics via peroxymonosulfate activation with a Cu-based metal–organic framework

Ying Wu <sup>a</sup>, Gang Liang <sup>a</sup>, Wen-Bin Li <sup>a</sup>, Xiao-Feng Zhong <sup>a</sup>, Yang-Yang Zhang <sup>a</sup>, Jia-Wen

Ye <sup>a</sup>, Tao Yang <sup>a\*</sup>, Zong-Wen Mo <sup>a\*</sup>, and Xiao-Ming Chen <sup>b</sup>

<sup>a</sup> *School of Environmental and Chemical Engineering, Jiangmen Key Laboratory of Synthetic Chemistry and Cleaner Production, Wuyi University, Jiangmen, Guangdong 529020, China;*

<sup>b</sup> *MOE Key Laboratory of Bioinorganic and Synthetic Chemistry, GBRCE for Functional Molecular Engineering, School of Chemistry, IGCME, Sun Yat-Sen University, Guangzhou 510275, China;*

\* Corresponding author (Zong-Wen Mo and Tao Yang):

E-mail: wyuchemmw@126.com; leoyanghit@126.com

## 1. EXPERIMENTAL SECTION

### 1.1. Reagents and Instruments.

All reagents and solvents were commercially purchased and used without further purification unless other noted. Elemental analysis (EA) was characterized with Perkin-Elmer 240 elemental analyzer. Thermogravimetric analyses were carried out on a NETZSCH TG209 F3 system under N<sub>2</sub> atmosphere with a heating rate of 10 °C min<sup>-1</sup>. Powder X-ray diffraction (PXRD) data were collected using a Rigaku Mimi X-ray powder diffractometer (Cu-Kα) at room temperature with a scan speed of 10 ° min<sup>-1</sup>. The antibiotics concentrations were determined by high-performance liquid chromatography (HPLC) (Waters) equipped with a BEH C18 column (2.1 × 100 mm; 1.7 μm particle size). Electron paramagnetic resonance (EPR) experiments were performed on a Bruker instrument under ambient atmospheric condition (Bruker 216 EMX nano, Germany). The chemical state changes of C, O, and Cu before and after the catalyst reaction were analyzed by X-ray photoelectron spectroscopy.

### 1.2. Synthesis of [Cu<sub>3</sub>(μ<sub>3</sub>-O)(pypz)<sub>3</sub>]NO<sub>3</sub>·guest (MAF-wyu2, 1).

A mixture of Cu(NO<sub>3</sub>)<sub>2</sub>·4H<sub>2</sub>O (2 mmol), 4-(1*H*-pyrazol-4-yl)pyridine (1 mmol), 1*H*-1,2,4-triazole (0.5 mmol) and *N,N*-dimethylacetamide (DMA, 50 mL) was stirred for 30 min, and then sealed in a 250-mL Teflon reactor and heated at 100 °C for 24 hours. After cooling to room temperature at a rate of 5 °C h<sup>-1</sup>, dark blue cubic crystals were collected, washed with DMF, and dried in air. EA Calcd. (%) for [Cu<sub>3</sub>(μ<sub>3</sub>-O)(C<sub>8</sub>H<sub>6</sub>N<sub>3</sub>)<sub>3</sub>]NO<sub>3</sub>·9(H<sub>2</sub>O)·2.8(C<sub>4</sub>H<sub>9</sub>NO), C<sub>35.2</sub>H<sub>61.2</sub>Cu<sub>3</sub>N<sub>12.8</sub>O<sub>13.8</sub>: C, 39.32; H, 5.74; N, 16.68. Found: C, 39.34; H, 5.63; N, 16.89.

### 1.3. Synthesis of MIL-53(Fe), MIL-101(Fe), [Cu<sub>3</sub>(μ-OH)(pzca)<sub>3</sub>(H<sub>3</sub>O)], HKUST-1, MOF-74, FDM-6, Cu-MFU-4l, [Cu<sub>3</sub>(PyCA)<sub>3</sub>].

These MOFs were synthesized based on the literature.<sup>1-6</sup>

### 1.4. The degradation of antibiotics experimental procedures.

All experiments were conducted at room temperature in 100 mL open beaker with a magnetic stirrer. 1.25 mg of the prepared sample was dispersed in 50 mL antibiotics solution (5 μmol L<sup>-1</sup>) and distributed uniformly by sonication. The adsorption-

desorption equilibrium was reached by stirring the suspension solution for 30 min. Thereafter, PMS was added and stirred to ensure that the solution was mixed homogeneously. Meanwhile, the samples (1.0 mL suspension) were extracted and mixed with 10% hydroxylamine hydrochloride to stop the reaction at certain intervals. The sample was filtered through a 0.22  $\mu\text{m}$  membrane and analyzed for SMX concentration by HPLC. The solutions with different pH are adjusted to the desired value by using  $\text{HClO}_4$  or 0.10 mol  $\text{L}^{-1}$  NaOH. For the quenching experiments, methanol, ascorbic acid and furfuryl alcohol were added to the SMX-containing solution before the reaction. All experiments were replicated in triplicates.

### 1.5. Determination of PMS concentration.

The PMS concentration was estimated by a modified iodometric titration method. Firstly, a highly concentrated potassium iodide solution (KI, 0.50 mol  $\text{L}^{-1}$ ) as well as a 50 mmol  $\text{L}^{-1}$  PMS solution was prepared. To dilute the PMS solution of 20  $\mu\text{L}$  to 5 mL, and mixed 500  $\mu\text{L}$  from the diluted PMS solution with 500  $\mu\text{L}$  of 0.50 mol  $\text{L}^{-1}$  KI solution. After 10 min of reaction, the ultra-pure water was added and diluted to 5 mL, and the color-generating sample was detected at  $\lambda = 351 \text{ nm}$  (UV-Vis spectrophotometer).

### 1.6. HPLC analysis.

Each sample was drawn 20  $\mu\text{L}$ , injected and separated by the column with a flow rate of 0.30 mL  $\text{min}^{-1}$ . The mobile phase ratio of the various targets as follow:

| Substrate              | Mobile phase ratio (v:v)              |
|------------------------|---------------------------------------|
| sulfamethoxazole (SMX) | Methanol : 1‰ acetic acid = 60:40     |
| oxytetracycline (OTC)  | Acetonitrile : 1‰ acetic acid = 20:80 |
| sulfamethazine (SMZ)   | Methanol : 1‰ acetic acid = 60:40     |
| ciprofloxacin (CIP)    | Methanol : 1‰ acetic acid = 30:70     |
| tetracycline (TC)      | Methanol : 1‰ acetic acid = 80:20     |

### 1.7. EPR measurement.

5,5-Dimethyl-1-pyrroline *N*-oxide (DMPO) and 2,2,6,6-tetramethyl-4-piperidinol (TEMP) can be used as spin traps for the detection of free radicals in solution, respectively. Initially, DMPO- $\text{H}_2\text{O}$  mixture, DMPO-MeOH mixture, and TEMP- $\text{H}_2\text{O}$

mixture were prepared. After that, 1 mL of suspension was extracted from the reaction solution with the catalyst, trapping agent and PMS at certain intervals (5 min, 15 min, 25 min) and the solution was aspirated with a quartz capillary to detect the spin-trapping adducts on an EPR spectrometer.

### 1.8 The degradation efficiency .

The degradation efficiency is the evolution of the substrate concentration over a given time interval and can be calculated by **eqn. S1**:

$$Efficiency (\%) = \frac{C_0 - C_t}{C_0} \times 100 \quad \text{eqn. S1}$$

where  $C_0$  and  $C_t$  are the concentrations of SMX at 0 min and at different time intervals, respectively.

### 1.9. Pseudo-first-order kinetics for SMX degradation.

The kinetic rates constant for SMX degradation is consistent with pseudo-first-order kinetics model, while the degradation rate of SMX can be calculated by **eqn. S2**:

$$\ln\left(\frac{C_t}{C_0}\right) = -k_{obs}t \quad \text{eqn. S2}$$

where  $C_0$  and  $C_t$  are the concentrations of SMX at 0 min and at different time intervals, respectively.  $k_{obs}$  denotes the pseudo-first-order kinetics constant rate ( $\text{min}^{-1}$ ), while  $t$  is the reaction time.

### 1.10. The turnover number (TON) and turnover frequency (TOF).

The transformation efficiency for SMX at the active sites of MOF can expressed with TON, while this value can be calculated by **eqn. S3**:

$$TON = \frac{(Efficiency (\%))(Number\ of\ moles\ of\ substrate)}{Number\ of\ moles\ of\ catalyst} \quad \text{eqn. S3}$$

TOF is the number of reaction cycles taking place in the established time intervals and can be calculated by **eqn S4**:

$$TOF = \frac{TON}{Time} \quad \text{eqn. S4}$$

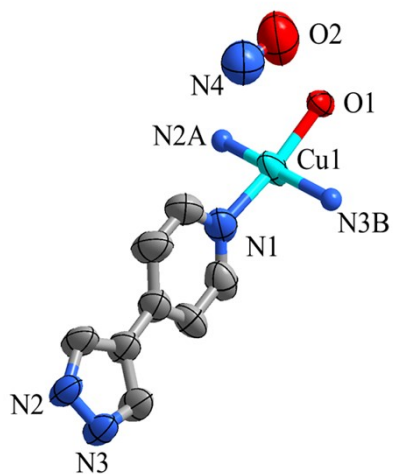

**Fig. S1.** The asymmetric unit of **1** (symmetry codes: A =  $1/2-x, 1-y, 1/2+z$ ; B =  $x, y, z$ ).

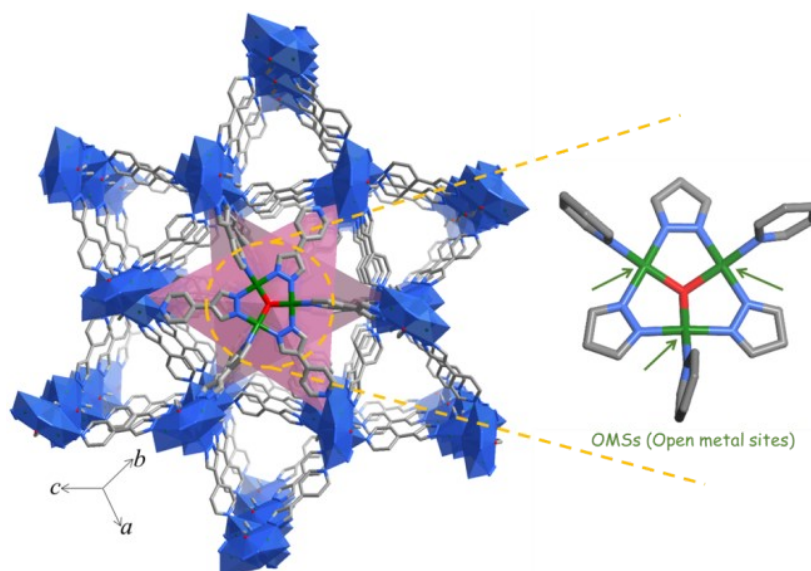

**Fig. S2.** The classic planar trinuclear  $[\text{Cu}_3(\mu_3\text{-O})]^{4+}$  cluster with exposed OMSs in **1**.

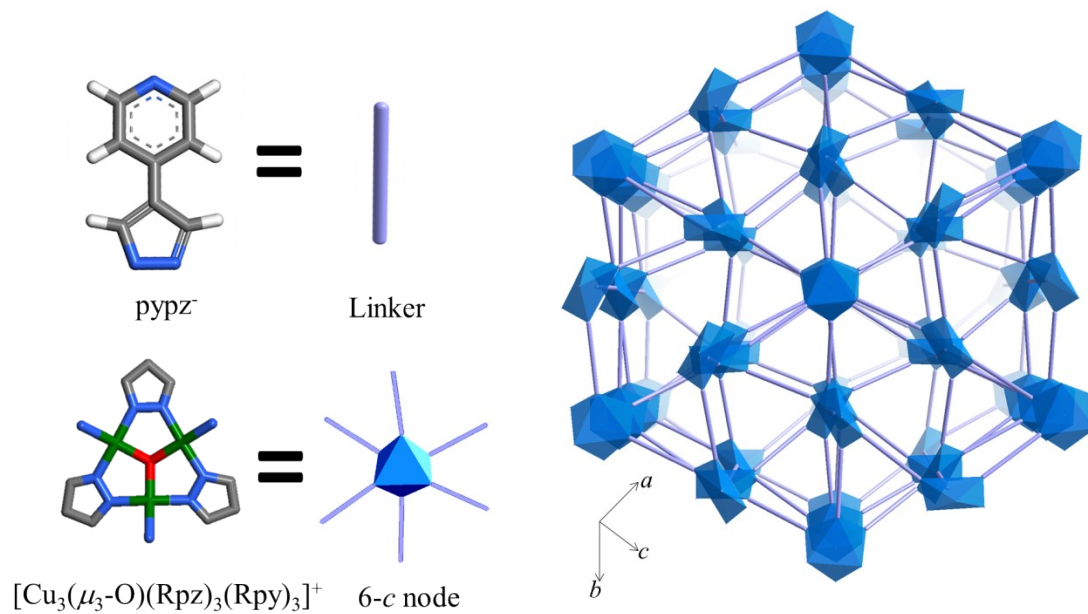

**Fig. S3.** The 6-connected topology network constructed by planar trinuclear  $[\text{Cu}_3(\mu_3\text{-O})]^{4+}$  clusters and pypz<sup>-</sup> ligands.

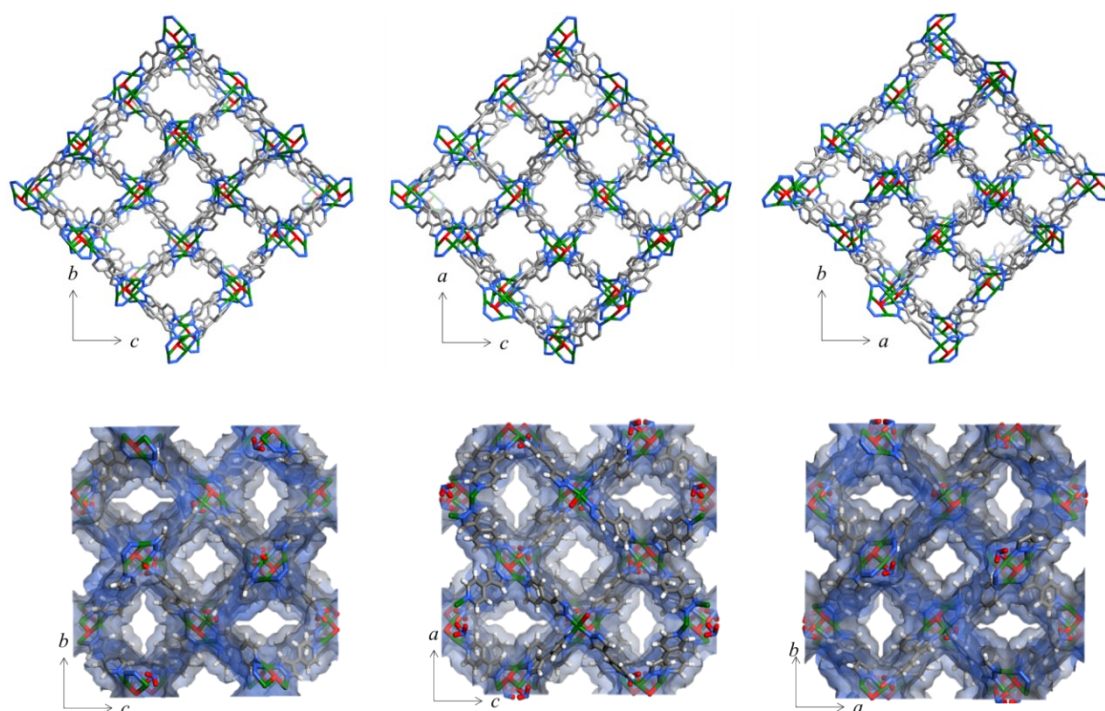

**Fig. S4.** The 3D coordination framework and pore surface structure of **1** along the *a*, *b*, *c*-axis, respectively.

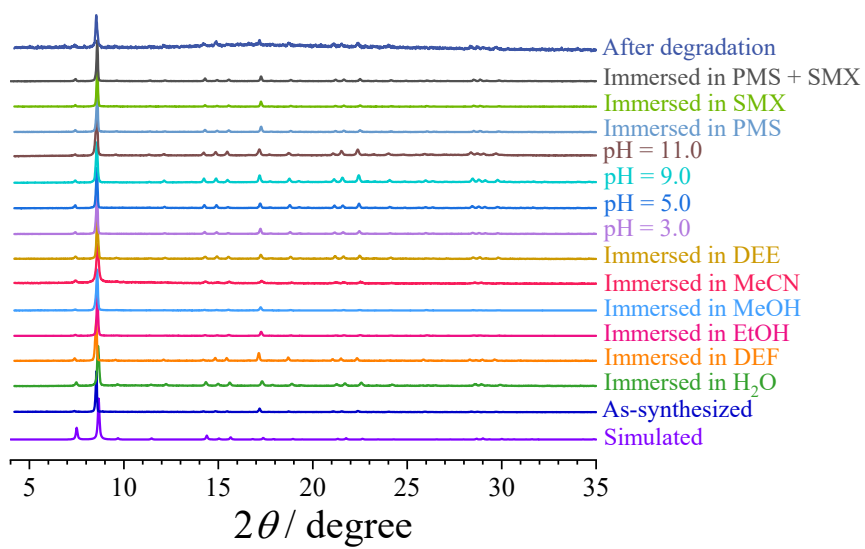

**Fig. S5.** PXRD patterns of **1** under various solvents.

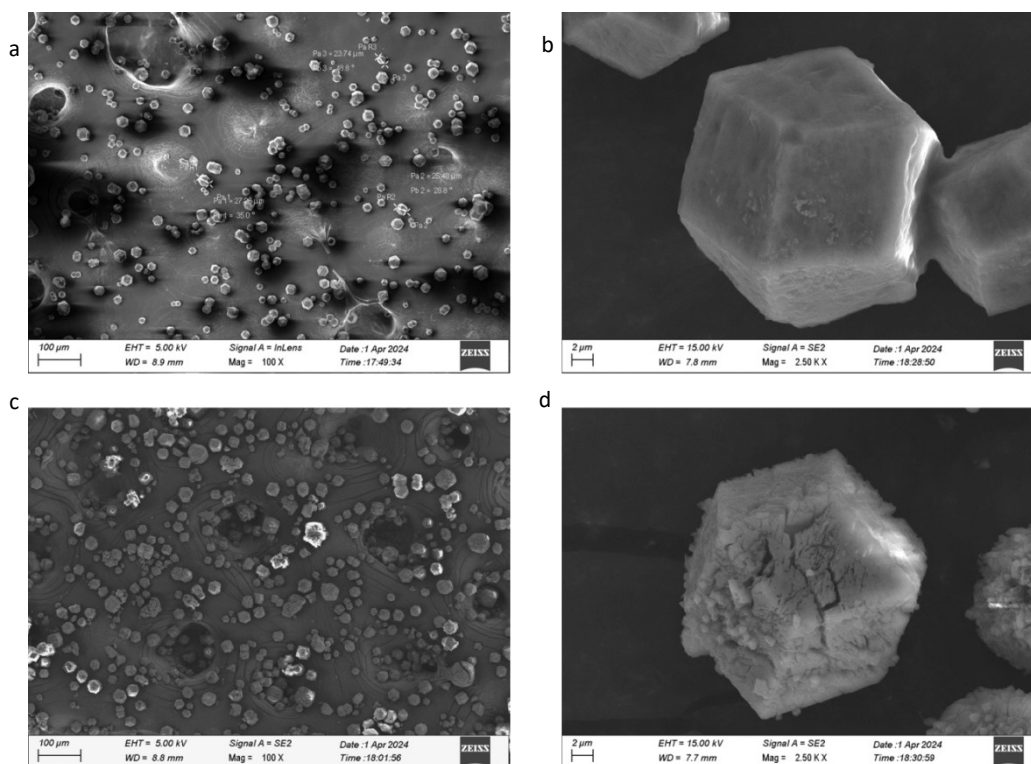

**Fig. S6.** The SEM images of **1** (a), (b) before and (c), (d) after the degradation.

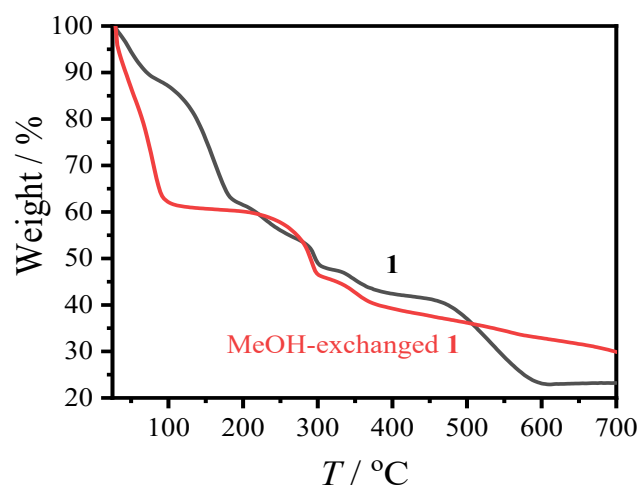

**Fig. S7.** Thermogravimetry curves of as-synthesized **1** and MeOH-exchanged **1**.



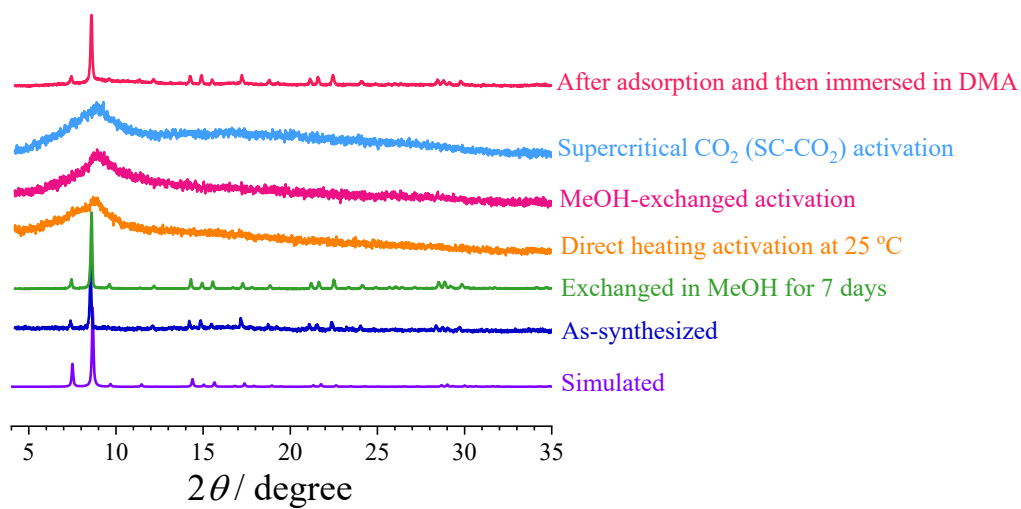

**Fig. S8.** PXRD patterns of activated **1** in various methods, and solvent soaking experiments.

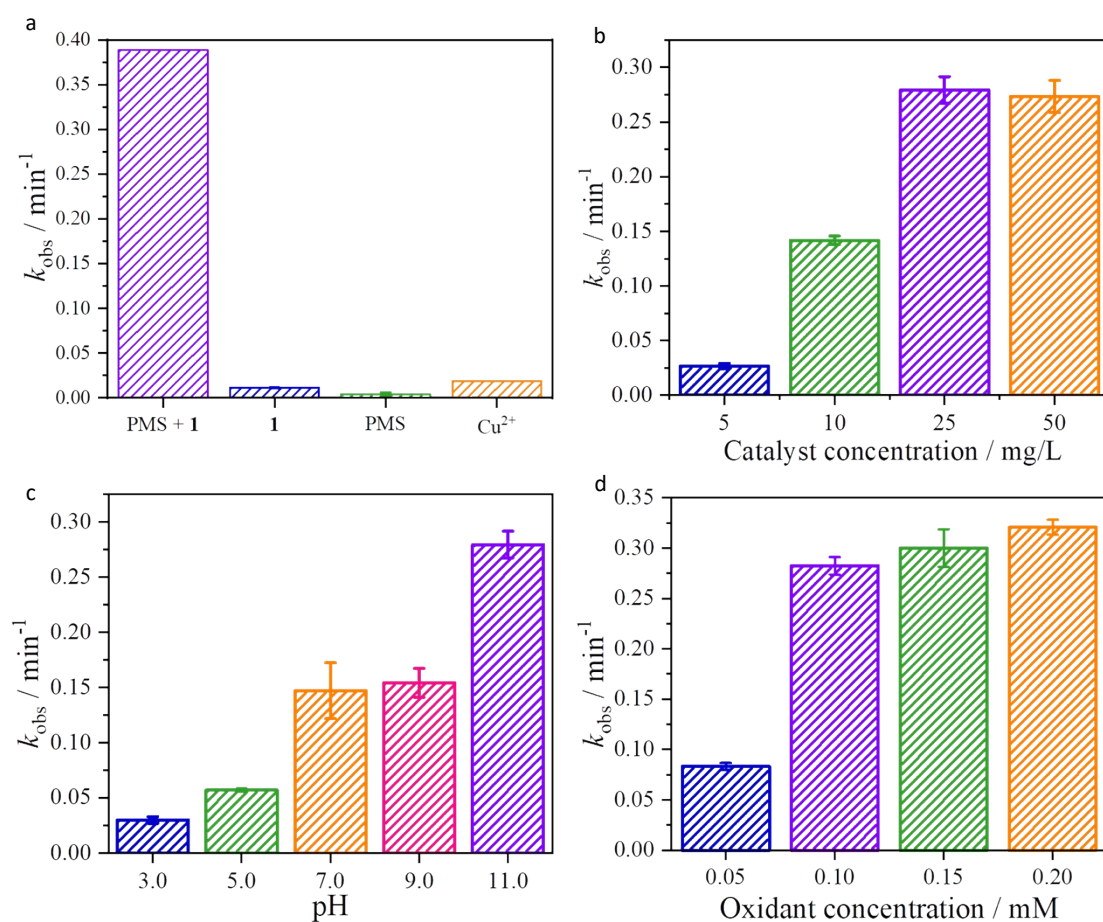

**Fig. S9.** (a) Degradation rates of SMX under different reaction systems. (Experimental conditions: pH = 7.0, SMX = 5  $\mu\text{M}$ , Catalysts = 100 mg L<sup>-1</sup>, pH = 11.0,  $\text{Cu}^{2+}$  = 100 mg L<sup>-1</sup>, PMS = 100  $\mu\text{M}$ , T = 25 °C). The influence of different reaction conditions of (b) catalyst concentration, (c) pH value, (d) oxidant concentration on SMX degradation rate. (Experimental conditions: pH = 11.0, SMX = 5  $\mu\text{M}$ , Catalyst = 25 mg L<sup>-1</sup>, PMS = 100  $\mu\text{M}$ , T = 25 °C)

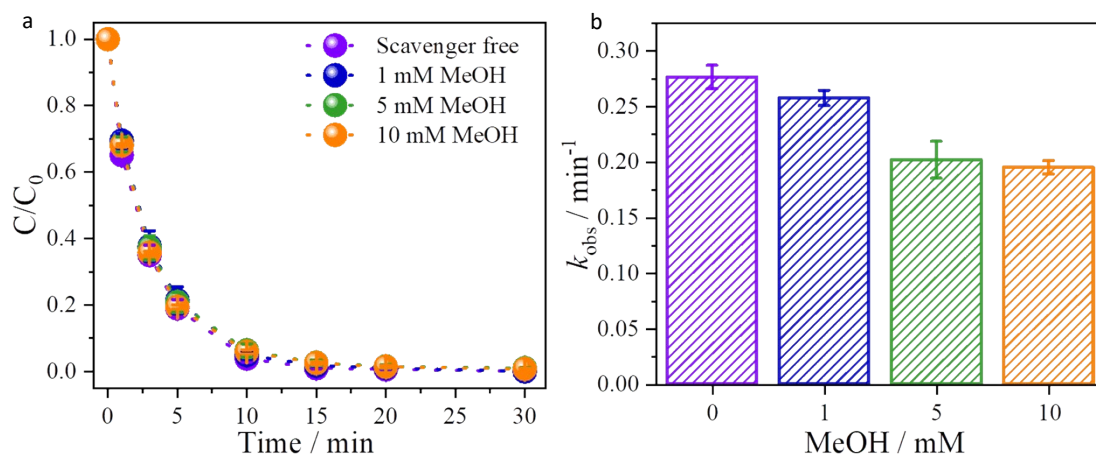

**Fig. S10.** MeOH quencher concentrations on (a) the SMX degradation efficiency, (b) the degradation rate. (Experimental conditions: pH = 11.0, SMX = 5  $\mu\text{M}$ , Catalysts = 25 mg L<sup>-1</sup>, PMS = 100  $\mu\text{M}$ , T = 25 °C, MeOH = 1 mM, 5 mM, 10 mM)

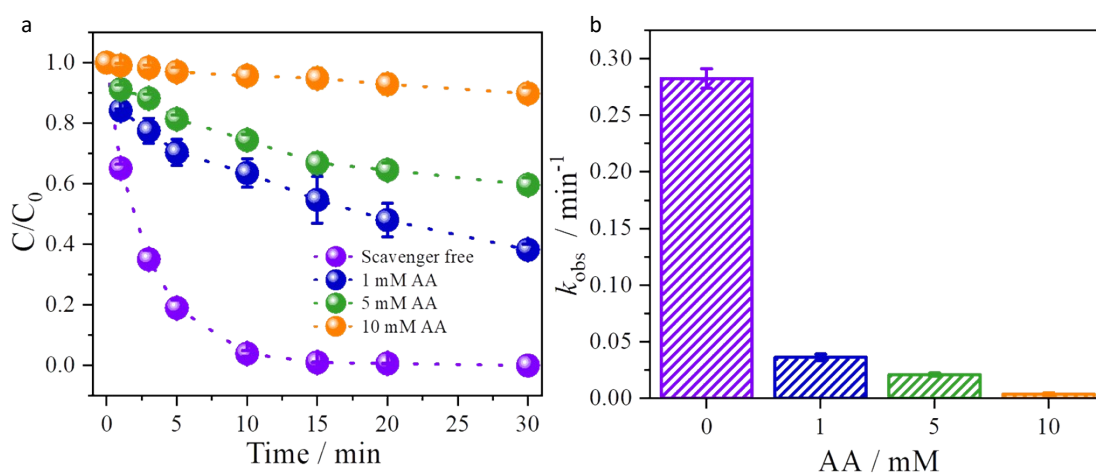

**Fig. S11.** AA quencher concentrations on (a) the SMX degradation efficiency, (b) the degradation rate. (Experimental conditions: pH = 11.0, SMX = 5  $\mu\text{M}$ , Catalysts = 25 mg L<sup>-1</sup>, PMS = 100  $\mu\text{M}$ , T = 25 °C, L-ascorbic acid = 1 mM, 5 mM, 10 mM)

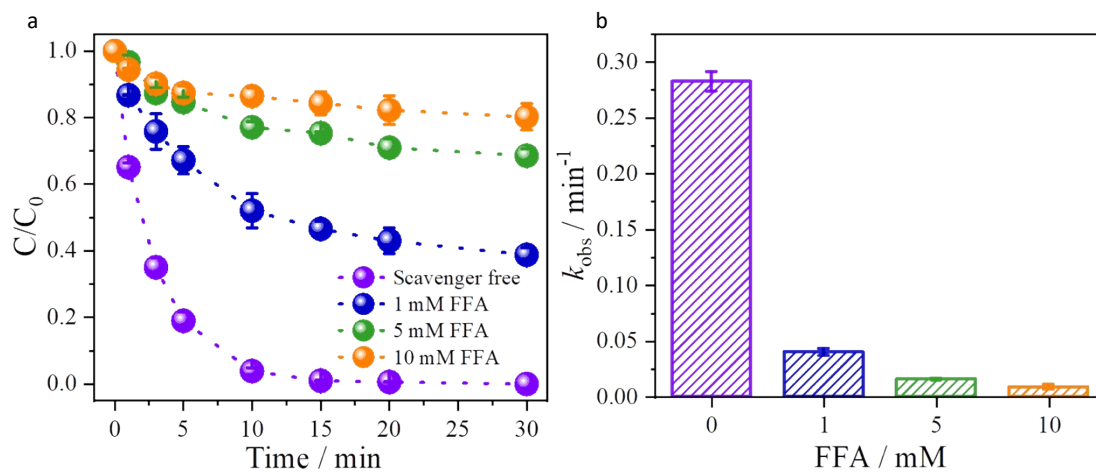

**Fig. S12.** FFA quencher concentrations on (a) the SMX degradation efficiency, (b) the degradation rate. (Experimental conditions: pH = 11.0, SMX = 5  $\mu\text{M}$ , Catalysts = 25  $\text{mg L}^{-1}$ , PMS = 100  $\mu\text{M}$ , T = 25  $^\circ\text{C}$ , FFA = 1 mM, 5 mM, 10 mM)

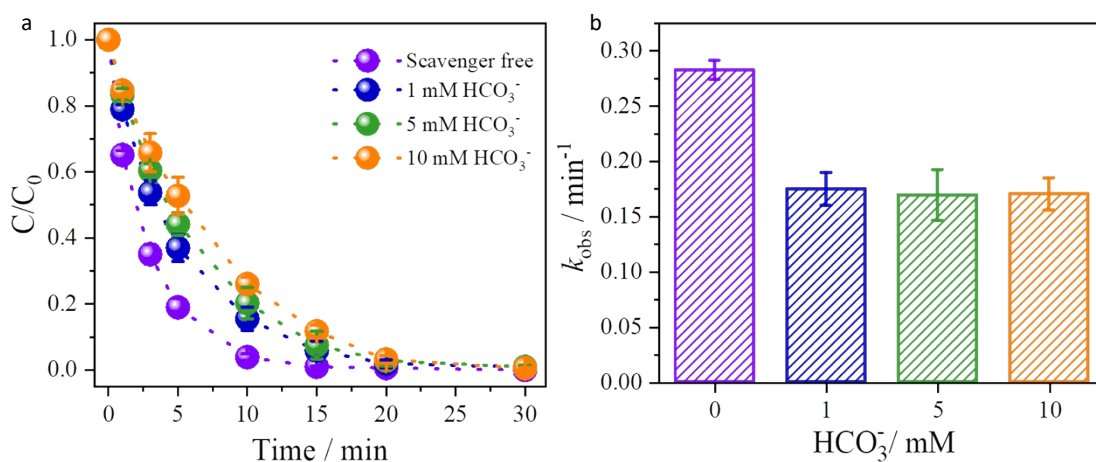

**Fig. S13.** (a) The degradation efficiency and (b) degradation rate of SMX at different  $\text{HCO}_3^-$  concentrations. (Experimental conditions: pH = 11.0, SMX = 5  $\mu\text{M}$ , Catalysts = 25  $\text{mg L}^{-1}$ , PMS = 100  $\mu\text{M}$ , T = 25  $^\circ\text{C}$ ,  $\text{HCO}_3^-$  = 1 mM, 5 mM, 10 mM)

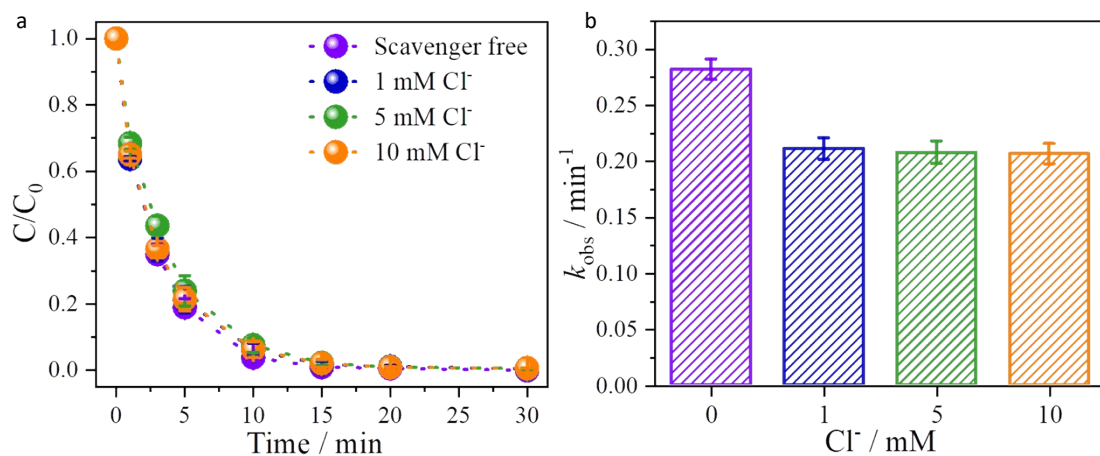

**Fig. S14.** (a) The degradation efficiency and (b) degradation rate of SMX at different  $\text{Cl}^-$  concentrations. (Experimental conditions: pH = 11.0, SMX = 5  $\mu\text{M}$ , Catalysts = 25  $\text{mg L}^{-1}$ , PMS = 100  $\mu\text{M}$ , T = 25  $^\circ\text{C}$ ,  $\text{Cl}^-$  = 1 mM, 5 mM, 10 mM)

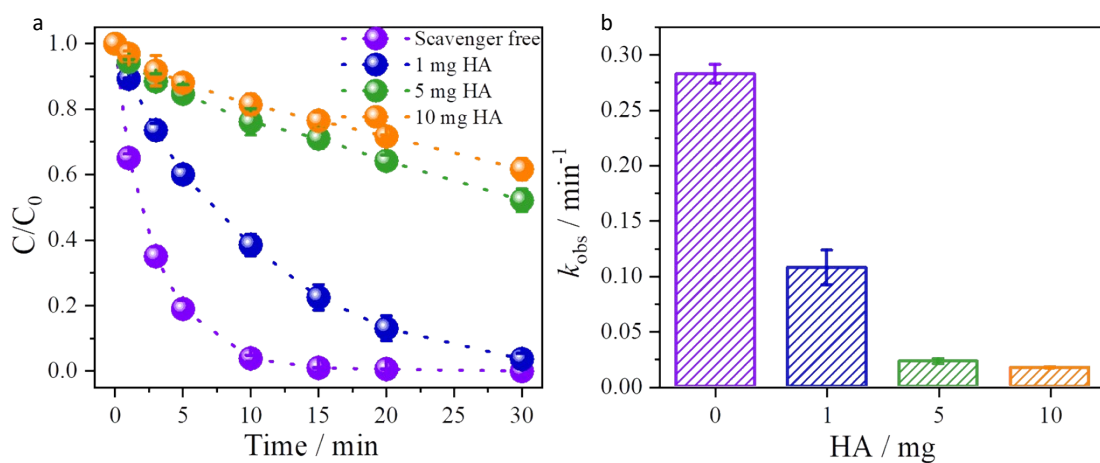

**Fig. S15.** (a) The degradation efficiency and (b) degradation rate of SMX at different HA concentrations. (Experimental conditions: pH = 11.0, SMX = 5  $\mu\text{M}$ , Catalysts = 25  $\text{mg L}^{-1}$ , PMS = 100  $\mu\text{M}$ , T = 25  $^\circ\text{C}$ , HA = 1 mM, 5 mM, 10 mM)

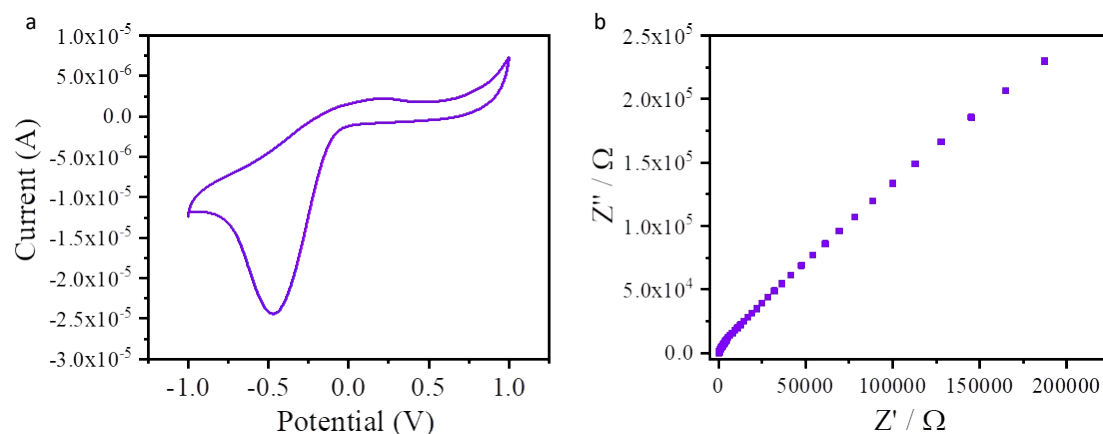

**Fig. S16.** (a) The cyclic voltammetry curve (CV) and (b) electrochemical impedance spectroscopy (EIS) of **1**.

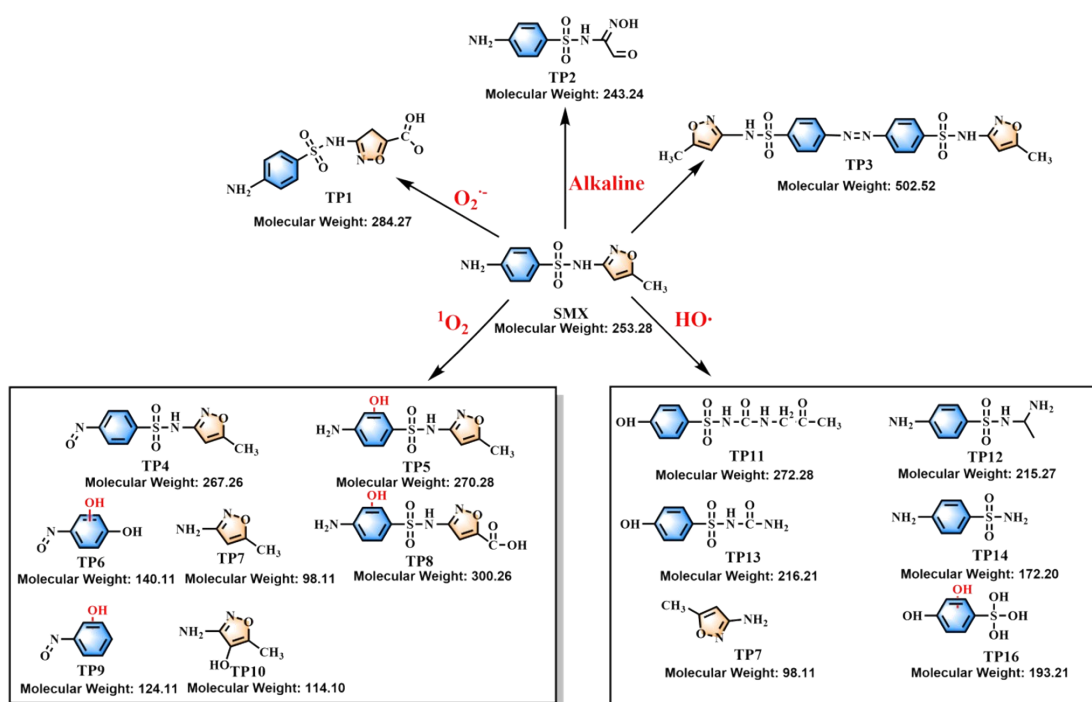

**Fig. S17.** The products/byproducts produced during the process of degradation.

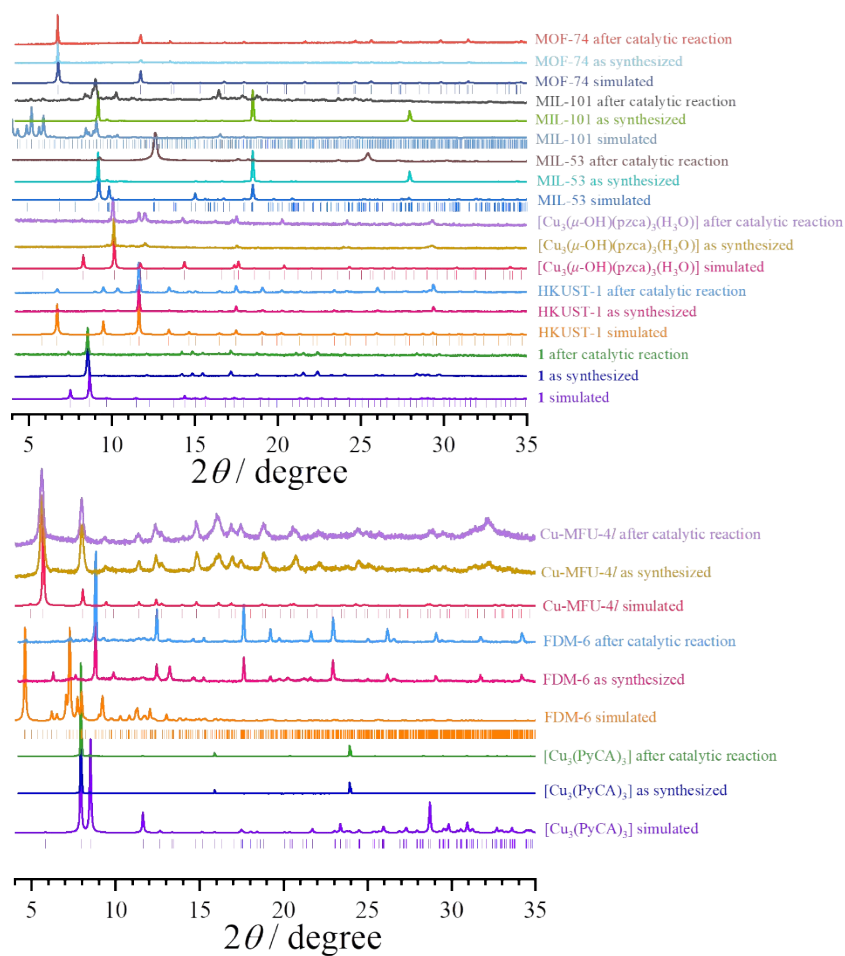

**Fig. S18.** PXRD patterns of **1** and other classical materials before and after the degradation.

**Table S1.** Crystallographic data and structural refinement details of **1**.

| Complex                                                          | 1                                                                              |
|------------------------------------------------------------------|--------------------------------------------------------------------------------|
| Formula                                                          | C <sub>24</sub> H <sub>18</sub> Cu <sub>3</sub> N <sub>10</sub> O <sub>2</sub> |
| Formula weight                                                   | 669.10                                                                         |
| Temperature (K)                                                  | 298(2)                                                                         |
| Crystal system                                                   | cubic                                                                          |
| Space group                                                      | <i>I</i> -43 <i>d</i>                                                          |
| <i>a</i> /Å                                                      | 28.8469(4)                                                                     |
| <i>b</i> /Å                                                      | 28.8469(4)                                                                     |
| <i>c</i> /Å                                                      | 28.8469(4)                                                                     |
| $\alpha$ /°                                                      | 90                                                                             |
| $\beta$ /°                                                       | 90                                                                             |
| $\gamma$ /°                                                      | 90                                                                             |
| <i>V</i> /Å <sup>3</sup>                                         | 24004.8(10)                                                                    |
| <i>Z</i>                                                         | 16                                                                             |
| <i>D<sub>c</sub></i> /g cm <sup>-3</sup>                         | 0.741                                                                          |
| reflns coll.                                                     | 13693                                                                          |
| unique reflns                                                    | 3830                                                                           |
| <i>R</i> <sub>int</sub>                                          | 0.0408                                                                         |
| <i>R</i> <sub>1</sub> [ <i>I</i> > 2σ( <i>I</i> )] <sup>a</sup>  | 0.0289                                                                         |
| <i>wR</i> <sub>2</sub> [ <i>I</i> > 2σ( <i>I</i> )] <sup>b</sup> | 0.0601                                                                         |
| <i>R</i> <sub>1</sub> (all data)                                 | 0.0396                                                                         |
| <i>wR</i> <sub>2</sub> (all data)                                | 0.0634                                                                         |
| GOF                                                              | 0.884                                                                          |

$$^a R_1 = \sum ||F_o| - |F_c|| / \sum |F_o|.$$

$$^b wR_2 = \{\sum w[(F_o)^2 - (F_c)^2]^2 / \sum w[(F_o)^2]^2\}^{1/2}$$



**Table S2.** Comparison of degradation performances of **1** and other materials.

|                                               | Catalyst concentration | pH value   | Oxidant concentration (PMS/PDS) | SMX                    | Reaction time (min) | Degradation efficiency (%) | Rate constant (min <sup>-1</sup> ) | Ref.      |
|-----------------------------------------------|------------------------|------------|---------------------------------|------------------------|---------------------|----------------------------|------------------------------------|-----------|
| <b>1</b>                                      | 25 mg L <sup>-1</sup>  | 11.0       | 0.10 mM                         | 5 μM                   | 30                  | 100.00                     | 0.282                              | This work |
|                                               |                        | 9.0        |                                 |                        | 30                  | 97.98                      | 0.154                              |           |
|                                               |                        | 7.0        |                                 |                        | 30                  | 97.89                      | 0.147                              |           |
| <b>MIL-88B(NH<sub>2</sub>)(F<sub>e</sub>)</b> | 1.0 g L <sup>-1</sup>  | 5.0        | 1 g L <sup>-1</sup>             | 10 mg L <sup>-1</sup>  | 120                 | 95                         | 0.0216                             | 7         |
| <b>Fe@C-800</b>                               | 0.4 g L <sup>-1</sup>  | ambient pH | PDS (0.2 mM)                    | 10 mg L <sup>-1</sup>  | 180                 | 100.00                     | 0.074                              | 8         |
| <b>SA-Cu/rGO</b>                              | 0.1 g L <sup>-1</sup>  | 6.0        | 0.4 g L <sup>-1</sup>           | 10 mg L <sup>-1</sup>  | 60                  | 99.60                      | 0.088                              | 9         |
| <b>LaMnO<sub>3</sub>-Cu-3</b>                 | 0.2 g L <sup>-1</sup>  | 7.0        | 1.3 mM                          | 19.76 μm               | 20                  | 100.00                     | 0.200                              | 10        |
| <b>CuCo-HT</b>                                | 1.0 g L <sup>-1</sup>  | 7.0        | 0.15 mM                         | 0.1 mM                 | 40                  | 97.60                      | 0.098                              | 11        |
| <b>CuO@FeO<sub>x</sub>@Fe<sub>0</sub></b>     | 1.0 g L <sup>-1</sup>  | 5.7        | 0.2 mM                          | 10 mg L <sup>-1</sup>  | 10                  | 86.80                      | 0.212                              | 12        |
| <b>CoFeO<sub>2.5</sub></b>                    | 0.2 g L <sup>-1</sup>  | 7.0        | 0.4 mM                          | 40 μm                  | 60                  | 100.00                     | 0.151                              | 13        |
| <b>Co-NP</b>                                  | 50 mg L <sup>-1</sup>  | 6.4        | 0.15 mM                         | 2.5 mg L <sup>-1</sup> | 60                  | 88.00                      | 0.034                              | 14        |
| <b>NRGO</b>                                   | 0.5 g L <sup>-1</sup>  | 3.4        | 0.8 mM                          | 0.04 mM                | 240                 | 91.70                      | 0.010                              | 15        |
| <b>DMDB-800</b>                               | 1.0 g L <sup>-1</sup>  | 5.56       | 2.5 mM                          | 15 mg L <sup>-1</sup>  | 60                  | 90.20                      | 0.025                              | 16        |
| <b>N, S-BC</b>                                | 0.2 g L <sup>-1</sup>  | 5.4        | 0.8 mM                          | 20 μm                  | 60                  | 91.32                      |                                    | 17        |
| <b>Co<sub>3</sub>O<sub>4</sub>@NP C/rGO</b>   | 20 mg L <sup>-1</sup>  | 7.0        | 0.2 mM                          | 25 mg L <sup>-1</sup>  | 10                  | 100                        | 0.3315                             | 18        |

**Table S3.** Comparison of degradation performances of **1**, classical planar trinuclear  $[\text{Cu}_3(\mu_3\text{-O})]^{4+}$  clusters and MOFs under the same conditions. (Experimental conditions: pH = 11.0, SMX = 5  $\mu\text{M}$ , Catalysts = 25 mg L<sup>-1</sup>, PMS = 100  $\mu\text{M}$ , T = 25 °C)

|                                                                   | Degradation efficiency (%) | Rate constant (min <sup>-1</sup> ) | TON          | TOF (min <sup>-1</sup> ) |
|-------------------------------------------------------------------|----------------------------|------------------------------------|--------------|--------------------------|
| <b>1</b>                                                          | <b>100.00</b>              | <b>0.282</b>                       | <b>0.038</b> | <b>0.008</b>             |
| $[\text{Cu}_3(\mu\text{-OH})(\text{pzca})_3(\text{H}_3\text{O})]$ | 71.11                      | 0.043                              | 0.005        | 0.001                    |
| HKUST-1                                                           | 70.60                      | 0.047                              | 0.012        | 0.002                    |
| MIL-53(Fe)                                                        | 25.13                      | 0.011                              | 0.005        | 0.001                    |
| MIL-101(Fe)                                                       | 23.78                      | 0.010                              | 0.009        | 0.002                    |
| MOF-74                                                            | 23.34                      | 0.012                              | 0.005        | 0.001                    |
| FDM-6                                                             | 59.30                      | 0.039                              | 0.028        | 0.006                    |
| Cu-MFU-4l                                                         | 71.68                      | 0.053                              | 0.036        | 0.007                    |
| $[\text{Cu}_3(\text{PyCA})_3]$                                    | 83.45                      | 0.059                              | 0.008        | 0.002                    |

## Reference

- 1 P. Horcajada, C. Serre, G. Maurin, N. A. Ramsahye, F. Balas, M. Vallet-Regí, M. Sebban, F. Taulelle and G. Férey, Flexible porous metal-organic frameworks for a controlled drug delivery, *J. Am. Chem. Soc.*, 2008, **130**, 6774-6780.
- 2 K. M. L. Taylor-Pashow, J. Della Rocca, Z. G. Xie, S. Tran and W. B. Lin, Postsynthetic Modifications of Iron-Carboxylate Nanoscale Metal-Organic Frameworks for Imaging and Drug Delivery, *J. Am. Chem. Soc.*, 2009, **131**, 14261-+.
- 3 S. Q. Su, Y. B. Zhang, M. Zhu, X. Z. Song, S. Wang, S. N. Zhao, S. Y. Song, X. G. Yang and H. J. Zhang, An active-site-accessible porous metal-organic framework composed of triangular building units: preparation, catalytic activity and magnetic property, *Chem. Commun.*, 2012, **48**, 11118-11120.
- 4 B. B. Tu, Q. Q. Pang, H. S. Xu, X. M. Li, Y. L. Wang, Z. Ma, L. H. Weng and Q. W. Li, Reversible Redox Activity in Multicomponent Metal-Organic Frameworks Constructed from Trinuclear Copper Pyrazolate Building Blocks, *J. Am. Chem. Soc.*, 2017, **139**, 7998-8007.
- 5 P. Y. You, K. M. Mo, Y. M. Wang, Q. Gao, X. C. Lin, J. T. Lin, M. Xie, R. J. Wei, G. H. Ning and D. Li, Reversible modulation of interlayer stacking in 2D copper-organic frameworks for tailoring porosity and photocatalytic activity, *Nat. Commun.*, 2024, **15**, 11.
- 6 D. Denysenko, M. Grzywa, J. Jelic, K. Reuter and D. Volkmer, Scorpionate-Type Coordination in MFU-4l Metal-Organic Frameworks: Small-Molecule Binding and Activation upon the Thermally Activated Formation of Open Metal Sites, *Angew. Chem.-Int. Edit.*, 2014, **53**, 5832-5836.
- 7 J. Sun, J. Q. Wan, Y. Wang, Z. C. Yan, Y. W. Ma, S. Ding, M. Tang and Y. C. Xie, Modulated construction of Fe-based MOF via formic acid modulator for enhanced degradation of sulfamethoxazole: Design, degradation pathways, and mechanism, *J. Hazard. Mater.*, 2022, **429**, 128299.
- 8 M. J. Pu, J. Q. Wan, F. Z. Zhang, M. L. Brusseau, D. Q. Ye and J. F. Niu, Insight into degradation mechanism of sulfamethoxazole by metal-organic framework derived novel magnetic Fe@C composite activated persulfate, *J. Hazard. Mater.*, 2021, **414**, 125598.
- 9 F. Chen, X. L. Wu, L. Yang, C. F. Chen, H. J. Lin and J. R. Chen, Efficient degradation and mineralization of antibiotics via heterogeneous activation of peroxymonosulfate by using graphene supported single -atom Cu catalyst, *Chem. Eng. J.*, 2020, **394**, 124904.
- 10 P. P. Gao, X. K. Tian, W. Fu, Y. X. Wang, Y. L. Nie, C. Yang and Y. Deng, Copper in LaMnO<sub>3</sub> to promote peroxymonosulfate activation by regulating the reactive oxygen species in sulfamethoxazole degradation, *J. Hazard. Mater.*, 2021, **411**, 125163.
- 11 J. Wang, Q. Gong, J. Ali, M. Shen, J. Y. Cai, X. Q. Zhou, Z. W. Liao, S. L. Wang and Z. Q. Chen, pH-dependent transformation products and residual toxicity evaluation of sulfamethoxazole degradation through non-radical oxygen species involved process, *Chem. Eng. J.*, 2020, **390**, 124512.
- 12 Y. L. He, J. L. Zhang, H. Y. Zhou, G. Yao and B. Lai, Synergistic multiple active species for the degradation of sulfamethoxazole by peroxymonosulfate in the presence of CuO@FeO<sub>x</sub>@Fe-O, *Chem. Eng. J.*, 2020, **380**, 122568.
- 13 Y. P. Bao, W. D. Oh, T. T. Lim, R. Wang, R. D. Webster and X. Hu, Elucidation of stoichiometric efficiency, radical generation and transformation pathway during catalytic oxidation of sulfamethoxazole via peroxymonosulfate activation, *Water Res.*, 2019, **151**, 64-74.
- 14 F. Liu, H. Y. Zhou, Z. C. Pan, Y. Liu, G. Yao, Y. Guo and B. Lai, Degradation of sulfamethoxazole by cobalt-nickel powder composite catalyst coupled with peroxymonosulfate: Performance, degradation pathways and mechanistic consideration, *J. Hazard. Mater.*, 2020, **400**, 123322.
- 15 S. Z. Wang, L. J. Xu and J. L. Wang, Nitrogen-doped graphene as peroxymonosulfate activator and electron transfer mediator for the enhanced degradation of sulfamethoxazole, *Chem. Eng. J.*, 2019, **375**, 122041.
- 16 Y. S. Wang, Y. J. Song, N. Li, W. Liu, B. B. Yan, Y. Yu, L. Liang, G. Y. Chen, L. A. Hou and S. B. Wang, Tunable active sites on biogas digestate derived biochar for sulfanilamide degradation by peroxymonosulfate activation, *J. Hazard. Mater.*, 2022, **421**, 126794.
- 17 Y. Xu, S. Liu, M. Wang, J. Zhang, H. J. Ding, Y. Q. Song, Y. Zhu, Q. X. Pan, C. Zhao and H. P. Deng, Thiourea-assisted one-step fabrication of a novel nitrogen and sulfur co-doped biochar from nanocellulose as metal-free catalyst for efficient activation of peroxymonosulfate, *J. Hazard. Mater.*, 2021, **416**, 125796.
- 18 Y. L. Chen, X. Bai, Y. T. Ji and T. Shen, Reduced graphene oxide-supported hollow Co<sub>3</sub>O<sub>4</sub>@N-doped porous carbon as peroxymonosulfate activator for sulfamethoxazole degradation, *Chem. Eng. J.*, 2022, **430**, 132951.
